# Supplementary material for: Simulated fire injury: effects of trunk girdling and partial defoliation on reproductive development of apple trees (Malus domestica)
Source: Springer Nature journal article supplement (doi:10.1007/s00468-024-02555-0), 2024-08-17
Supplement: MOESM1 [file 468_2024_2555_MOESM1_ESM.pdf]

## Supplementary Material

### Simulated fire injury: effects of trunk girdling and partial defoliation on reproductive development of apple trees (*Malus domestica*)

Gerhard C Rossouw<sup>1,2,\*</sup> Oluyoye Idowu<sup>2,3</sup> Aphrika Gregson<sup>3</sup> and Bruno P Holzapfel<sup>2,3</sup>

<sup>1</sup> School of Agricultural, Environmental and Veterinary Sciences, Charles Sturt University, Wagga Wagga, New South Wales, Australia

<sup>2</sup> Gulbali Institute (Agriculture, Water and Environment), Charles Sturt University, Wagga Wagga, New South Wales, Australia

<sup>3</sup> New South Wales Department of Primary Industries, Orange, New South Wales, Australia

\* Present address: Department of Agriculture and Fisheries, Mareeba Research Facility, Mareeba 4880 Queensland, Australia

Corresponding author: Gerhard C Rossouw [gerhard.rossouw@daf.qld.gov.au](mailto:gerhard.rossouw@daf.qld.gov.au)

#### Journal:

*Trees: Structure and Function*

**Online Resource 1:**

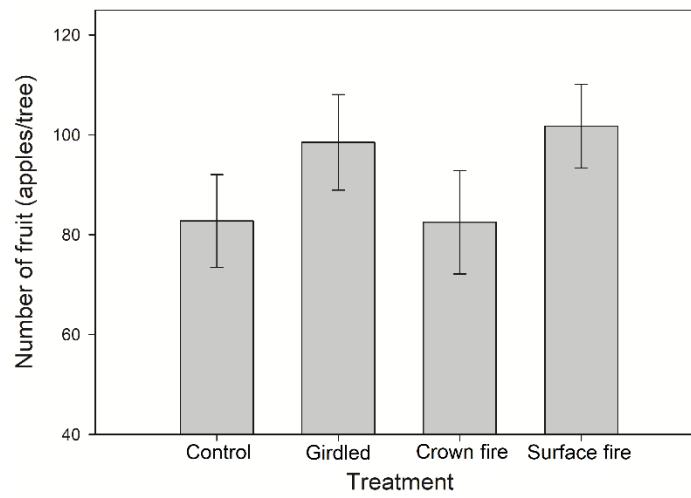

Effects of control, trunk girdling, simulated crown fire and simulated surface fire treatments on on average number of fruit present per tree at harvest (22 weeks after fruit set) (mean  $\pm$  SE; n = 4)

## Online Resource 2:

Impact of control, trunk girdling, simulated crown fire and simulated surface fire treatments on apple flesh and peel primary metabolite abundance (relative concentration calculated from the normalised peak area) at harvest. The GC/MS retention time, major fragment m/z, retention index, and the NIST library corresponding compound information are included.

| Metabolite    | Treatment    | Relative abundance (Fruit flesh) |    | Relative abundance (Peels) |    | RT (min) | m/z | Kegg ID | NIST library compound | Retention index |
|---------------|--------------|----------------------------------|----|----------------------------|----|----------|-----|---------|-----------------------|-----------------|
|               |              | Mean                             | SE | Mean                       | SE |          |     |         |                       |                 |
| Malic acid    | Control      | 2972.618                         |    | 116.9276                   |    | 86.13307 |     |         |                       |                 |
|               | Girdled      | 3381.867                         |    | 278.0171                   |    | 1614.539 |     |         |                       |                 |
|               | Crown fire   | 2677.871                         |    | 222.8679                   |    | 1389.119 |     |         |                       |                 |
|               | Surface fire | 2603.929                         |    | 153.8788                   |    | 1430.629 |     |         |                       |                 |
| Fructose      | Control      | 13348.24                         |    | 2082.304                   |    | 3460.340 |     |         |                       |                 |
|               | Girdled      | 14584.08                         |    | 2717.708                   |    | 3454.681 |     |         |                       |                 |
|               | Crown fire   | 11805.98                         |    | 3553.323                   |    | 2874.985 |     |         |                       |                 |
|               | Surface fire | 13222.96                         |    | 2316.524                   |    | 2851.196 |     |         |                       |                 |
| Glucose       | Control      | 550.0408                         |    | 152.6131                   |    | 282.5039 |     |         |                       |                 |
|               | Girdled      | 737.7877                         |    | 110.3821                   |    | 296.0811 |     |         |                       |                 |
|               | Crown fire   | 340.7779                         |    | 224.0491                   |    | 288.9070 |     |         |                       |                 |
|               | Surface fire | 87.4840                          |    | 4.7955                     |    | 350.6592 |     |         |                       |                 |
| Sorbitol      | Control      | 1784.869                         |    | 137.7501                   |    | 1093.464 |     |         |                       |                 |
|               | Girdled      | 2469.753                         |    | 454.0911                   |    | 1093.052 |     |         |                       |                 |
|               | Crown fire   | 1445.864                         |    | 250.6701                   |    | 1160.808 |     |         |                       |                 |
|               | Surface fire | 1202.311                         |    | 130.2277                   |    | 798.454  |     |         |                       |                 |
| Sucrose       | Control      | 35649.98                         |    | 6168.445                   |    | 7905.522 |     |         |                       |                 |
|               | Girdled      | 41033.06                         |    | 8725.781                   |    | 7113.252 |     |         |                       |                 |
|               | Crown fire   | 31099.25                         |    | 10240.32                   |    | 6428.901 |     |         |                       |                 |
|               | Surface fire | 35109.39                         |    | 6764.57                    |    | 6148.229 |     |         |                       |                 |
| Lactic acid   | Control      | 2.113291                         |    | 0.109186                   |    | 1.693238 |     |         |                       |                 |
|               | Girdled      | 1.914024                         |    | 0.038680                   |    | 1.774546 |     |         |                       |                 |
|               | Crown fire   | 1.997473                         |    | 0.071910                   |    | 1.637866 |     |         |                       |                 |
|               | Surface fire | 1.715741                         |    | 0.281973                   |    | 1.633184 |     |         |                       |                 |
| Glycolic acid | Control      | 1.099633                         |    | 0.041404                   |    | 0.762098 |     |         |                       |                 |
|               | Girdled      | 0.997486                         |    | 0.038220                   |    | 0.887226 |     |         |                       |                 |
|               | Crown fire   | 1.206477                         |    | 0.062968                   |    | 1.096366 |     |         |                       |                 |
|               | Surface fire | 1.276809                         |    | 0.022655                   |    | 1.010853 |     |         |                       |                 |
| Valine        | Control      | 0.032081                         |    | 0.005406                   |    | 0.022879 |     |         |                       |                 |
|               | Girdled      | 0.026372                         |    | 0.006226                   |    | 0.023668 |     |         |                       |                 |
|               | Crown fire   | 0.028127                         |    | 0.007029                   |    | 0.032361 |     |         |                       |                 |
|               | Surface fire | 0.023062                         |    | 0.006113                   |    | 0.025928 |     |         |                       |                 |
| Alanine       | Control      | 0.233291                         |    | 0.137663                   |    | 1.173939 |     |         |                       |                 |
|               | Girdled      | 0.173579                         |    | 0.046065                   |    | 1.171154 |     |         |                       |                 |
|               | Crown fire   | 0.408153                         |    | 0.164005                   |    | 1.114099 |     |         |                       |                 |
|               | Surface fire | 0.137995                         |    | 0.039998                   |    | 1.152226 |     |         |                       |                 |
| Leucine       | Control      | 0.165619                         |    | 0.014321                   |    | 0.069836 |     |         |                       |                 |
|               | Girdled      | 0.159973                         |    | 0.018235                   |    | 0.074776 |     |         |                       |                 |
|               | Crown fire   | 0.182446                         |    | 0.013041                   |    | 0.071228 |     |         |                       |                 |
|               | Surface fire | 0.192756                         |    | 0.024959                   |    | 0.071827 |     |         |                       |                 |
| Benzoic acid  | Control      | 0.494281                         |    | 0.039835                   |    | 1.027947 |     |         |                       |                 |
|               | Girdled      | 0.441823                         |    | 0.032465                   |    | 0.951863 |     |         |                       |                 |
|               | Crown fire   | 0.641696                         |    | 0.119484                   |    | 0.902081 |     |         |                       |                 |
|               | Surface fire | 0.561515                         |    | 0.025257                   |    | 1.078614 |     |         |                       |                 |
| Malonic acid  | Control      | 0.253135                         |    | 0.012818                   |    | 0.123267 |     |         |                       |                 |
|               | Girdled      | 0.241163                         |    | 0.018724                   |    | 0.136622 |     |         |                       |                 |
|               | Crown fire   | 0.232511                         |    | 0.015349                   |    | 0.110126 |     |         |                       |                 |
|               | Surface fire | 0.213562                         |    | 0.012545                   |    | 0.124964 |     |         |                       |                 |
| Urea          | Control      | 0.425903                         |    | 0.131364                   |    | 0.013089 |     |         |                       |                 |
|               | Girdled      | 0.220170                         |    | 0.147866                   |    | 0.034809 |     |         |                       |                 |
|               | Crown fire   | 0.212003                         |    | 0.076845                   |    | 0.034219 |     |         |                       |                 |
|               | Surface fire | 0.330461                         |    | 0.227707                   |    | 0.033969 |     |         |                       |                 |
| Serine        | Control      | 1.301163                         |    | 0.076260                   |    | 0.354258 |     |         |                       |                 |
|               | Girdled      | 1.474299                         |    | 0.261178                   |    | 0.333702 |     |         |                       |                 |
|               | Crown fire   | 1.239062                         |    | 0.093271                   |    | 0.289725 |     |         |                       |                 |
|               | Surface fire | 1.391340                         |    | 0.299442                   |    | 0.316875 |     |         |                       |                 |
| Isoleucine    | Control      | 0.139500                         |    | 0.006782                   |    | 0.089844 |     |         |                       |                 |
|               | Girdled      | 0.163316                         |    | 0.018497                   |    | 0.103528 |     |         |                       |                 |
|               | Crown fire   | 0.160413                         |    | 0.011465                   |    | 0.097605 |     |         |                       |                 |
|               | Surface fire | 0.148127                         |    | 0.018991                   |    | 0.094934 |     |         |                       |                 |
| Proline       | Control      | 0.016130                         |    | 0.004941                   |    | 0.003217 |     |         |                       |                 |
|               | Girdled      | 0.026759                         |    | 0.006640                   |    | 0.006605 |     |         |                       |                 |
|               | Crown fire   | 0.017754                         |    | 0.005116                   |    | 0.004988 |     |         |                       |                 |
|               | Surface fire | 0.016681                         |    | 0.008300                   |    | 0.004470 |     |         |                       |                 |
| Maleic acid   | Control      | 53.22708                         |    | 6.565373                   |    | 26.91351 |     |         |                       |                 |
|               | Girdled      | 49.24758                         |    | 6.488469                   |    | 27.45940 |     |         |                       |                 |
|               | Crown fire   | 44.96378                         |    | 7.442352                   |    | 24.57875 |     |         |                       |                 |
|               | Surface fire | 48.88056                         |    | 10.330297                  |    | 20.59704 |     |         |                       |                 |

|                     |              |          |          |          |          |       |       |        |                                                               |      |
|---------------------|--------------|----------|----------|----------|----------|-------|-------|--------|---------------------------------------------------------------|------|
| Succinic acid       | Control      | 3.761487 | 0.289778 | 3.181787 | 0.264381 | 10.07 | 147.1 | C00042 | Succinic acid (2TMS)                                          | 1322 |
|                     | Girdled      | 4.461238 | 0.502789 | 3.724735 | 0.376774 |       |       |        |                                                               |      |
|                     | Crown fire   | 29.21266 | 14.95121 | 2.988461 | 0.221629 |       |       |        |                                                               |      |
|                     | Surface fire | 18.34141 | 15.20221 | 2.749968 | 0.271790 |       |       |        |                                                               |      |
| Fumaric acid        | Control      | 2.682551 | 0.622524 | 1.435427 | 0.286273 | 10.5  | 245.1 | C00122 | Fumaric acid (2TMS)                                           | 1354 |
|                     | Girdled      | 2.270970 | 0.587368 | 1.614418 | 0.392013 |       |       |        |                                                               |      |
|                     | Crown fire   | 1.844846 | 0.557668 | 2.244352 | 0.321100 |       |       |        |                                                               |      |
|                     | Surface fire | 2.181227 | 0.660100 | 1.686425 | 0.253012 |       |       |        |                                                               |      |
| Oxalic acid         | Control      | 0.482728 | 0.022198 | 0.509935 | 0.021774 | 10.87 | 147.1 | C00209 | Oxalic acid (2TMS)                                            | 1381 |
|                     | Girdled      | 0.598525 | 0.051252 | 0.581292 | 0.036264 |       |       |        |                                                               |      |
|                     | Crown fire   | 0.516006 | 0.059794 | 0.468294 | 0.019256 |       |       |        |                                                               |      |
|                     | Surface fire | 0.442252 | 0.026560 | 0.433929 | 0.032017 |       |       |        |                                                               |      |
| Threonine           | Control      | 2.785324 | 0.125693 | 2.311002 | 0.112517 | 11.15 | 218   | C00188 | Threonine (N,O,O-TMS)                                         | 1402 |
|                     | Girdled      | 2.878663 | 0.093354 | 2.667285 | 0.200243 |       |       |        |                                                               |      |
|                     | Crown fire   | 2.774142 | 0.162737 | 2.295197 | 0.039450 |       |       |        |                                                               |      |
|                     | Surface fire | 2.416455 | 0.218414 | 2.212440 | 0.088149 |       |       |        |                                                               |      |
| β-Alanine           | Control      | 0.059386 | 0.002582 | 0.053012 | 0.002456 | 11.63 | 183.1 | C00099 | β-Alanine, 3TMS                                               | 1442 |
|                     | Girdled      | 0.056643 | 0.001035 | 0.054863 | 0.004930 |       |       |        |                                                               |      |
|                     | Crown fire   | 0.060390 | 0.004975 | 0.051848 | 0.002164 |       |       |        |                                                               |      |
|                     | Surface fire | 0.057028 | 0.004253 | 0.048452 | 0.001783 |       |       |        |                                                               |      |
| Citramalic acid     | Control      | 0.374588 | 0.031526 | 7.711949 | 0.916988 | 12.24 | 247.1 | C00815 | D(-)-Citramalic acid, 3TMS                                    | 1491 |
|                     | Girdled      | 0.380706 | 0.037448 | 11.72614 | 1.888319 |       |       |        |                                                               |      |
|                     | Crown fire   | 0.418408 | 0.023876 | 9.078831 | 1.725876 |       |       |        |                                                               |      |
|                     | Surface fire | 0.412419 | 0.033689 | 8.771051 | 1.716881 |       |       |        |                                                               |      |
| Threitol            | Control      | 1.565780 | 0.053780 | 1.636520 | 0.098003 | 12.76 | 103.1 | C16884 | L-Threitol, tetrakis(trimethylsilyl) ether                    | 1534 |
|                     | Girdled      | 1.629689 | 0.135586 | 1.791932 | 0.155969 |       |       |        |                                                               |      |
|                     | Crown fire   | 1.282064 | 0.027188 | 1.540096 | 0.062156 |       |       |        |                                                               |      |
|                     | Surface fire | 1.258881 | 0.078399 | 1.507282 | 0.152170 |       |       |        |                                                               |      |
| Aspartic acid       | Control      | 62.75513 | 2.944389 | 10.02938 | 1.034282 | 12.85 | 232.2 | C00049 | L-Aspartic acid, (3TMS)-                                      | 1541 |
|                     | Girdled      | 80.59078 | 10.41719 | 11.68194 | 1.802287 |       |       |        |                                                               |      |
|                     | Crown fire   | 70.35901 | 11.70768 | 10.14386 | 0.825806 |       |       |        |                                                               |      |
|                     | Surface fire | 63.81648 | 9.40301  | 9.64505  | 1.549982 |       |       |        |                                                               |      |
| Pyroglutamic acid   | Control      | 0.342481 | 0.036727 | 0.134047 | 0.006756 | 12.87 | 121.6 | C01879 | Pyroglutamic acid, (N,O-TMS)                                  | 1543 |
|                     | Girdled      | 0.369288 | 0.061677 | 0.167383 | 0.026932 |       |       |        |                                                               |      |
|                     | Crown fire   | 0.360241 | 0.037515 | 0.138767 | 0.010105 |       |       |        |                                                               |      |
|                     | Surface fire | 0.417898 | 0.015300 | 0.125422 | 0.018556 |       |       |        |                                                               |      |
| γ-Aminobutyric acid | Control      | 6.431955 | 1.324587 | 5.782130 | 0.848301 | 12.93 | 174.1 | C00334 | GABA 3TMS                                                     | 1548 |
|                     | Girdled      | 6.538700 | 1.022765 | 5.693284 | 0.715819 |       |       |        |                                                               |      |
|                     | Crown fire   | 8.426904 | 1.698280 | 7.068537 | 0.833687 |       |       |        |                                                               |      |
|                     | Surface fire | 7.210430 | 1.837485 | 6.260527 | 1.396436 |       |       |        |                                                               |      |
| Cysteine            | Control      | 0.321463 | 0.014976 | 0.264339 | 0.021298 | 13.23 | 117.1 | C00097 | L-Cysteine, 3TMS                                              | 1572 |
|                     | Girdled      | 0.298657 | 0.041701 | 0.287634 | 0.015160 |       |       |        |                                                               |      |
|                     | Crown fire   | 0.280693 | 0.025026 | 0.303315 | 0.032592 |       |       |        |                                                               |      |
|                     | Surface fire | 0.300495 | 0.035654 | 0.314726 | 0.012452 |       |       |        |                                                               |      |
| Threonic acid       | Control      | 2.402619 | 0.276824 | 1.307204 | 0.125105 | 13.38 | 73.1  | C01620 | Threonic acid, tris(trimethylsilyl) ether, trimethylsilyl est | 1583 |
|                     | Girdled      | 2.939555 | 0.246336 | 1.629672 | 0.175521 |       |       |        |                                                               |      |
|                     | Crown fire   | 2.984827 | 0.593831 | 1.688916 | 0.166139 |       |       |        |                                                               |      |
|                     | Surface fire | 2.248943 | 0.216180 | 1.492065 | 0.052709 |       |       |        |                                                               |      |
| α-Ketoglutaric acid | Control      | 0.062685 | 0.004441 | 0.061739 | 0.004975 | 13.46 | 156.1 | C00026 | 2-Ketoglutaric acid, 2TMS                                     | 1590 |
|                     | Girdled      | 0.072127 | 0.009902 | 0.070903 | 0.010151 |       |       |        |                                                               |      |
|                     | Crown fire   | 0.053160 | 0.012315 | 0.040451 | 0.003756 |       |       |        |                                                               |      |
|                     | Surface fire | 0.054638 | 0.011851 | 0.055305 | 0.009712 |       |       |        |                                                               |      |
| Arginine            | Control      | 0.065387 | 0.000696 | 0.056346 | 0.002315 | 13.91 | 494.3 | C00062 | Arginine, (3TMS)                                              | 1630 |
|                     | Girdled      | 0.057184 | 0.001999 | 0.057144 | 0.001383 |       |       |        |                                                               |      |
|                     | Crown fire   | 0.064443 | 0.001438 | 0.054129 | 0.002947 |       |       |        |                                                               |      |
|                     | Surface fire | 0.061045 | 0.002650 | 0.055206 | 0.001472 |       |       |        |                                                               |      |
| Glutamic acid       | Control      | 5.031079 | 0.543199 | 5.048407 | 0.367147 | 13.98 | 246.2 | C00025 | Glutamic acid (3TMS)                                          | 1637 |
|                     | Girdled      | 5.236224 | 0.673334 | 5.683895 | 0.506235 |       |       |        |                                                               |      |
|                     | Crown fire   | 4.382050 | 0.878098 | 4.501281 | 0.448313 |       |       |        |                                                               |      |
|                     | Surface fire | 5.487274 | 0.665480 | 5.060873 | 0.608947 |       |       |        |                                                               |      |
| Phenylalanine       | Control      | 0.358288 | 0.177649 | 0.162223 | 0.024594 | 14.06 | 218.1 | C00079 | Phenylalanine (N,O-TMS)                                       | 1644 |
|                     | Girdled      | 0.326161 | 0.096316 | 0.204898 | 0.023730 |       |       |        |                                                               |      |
|                     | Crown fire   | 0.456416 | 0.155859 | 0.450351 | 0.166036 |       |       |        |                                                               |      |
|                     | Surface fire | 0.338140 | 0.127920 | 0.209971 | 0.064562 |       |       |        |                                                               |      |
| Asparagine          | Control      | 0.390191 | 0.052919 | 0.168755 | 0.037757 | 14.16 | 188.1 | C00152 | Asparagine, O,O',N'-tris(trimethylsilyl)-                     | 1653 |
|                     | Girdled      | 0.513563 | 0.151473 | 0.159156 | 0.056922 |       |       |        |                                                               |      |
|                     | Crown fire   | 0.627536 | 0.092280 | 0.175153 | 0.051530 |       |       |        |                                                               |      |
|                     | Surface fire | 0.543414 | 0.122107 | 0.127689 | 0.030151 |       |       |        |                                                               |      |
| Tartaric acid       | Control      | 0.114422 | 0.023203 | 0.343894 | 0.017013 | 14.3  | 188.1 | C00898 | Tartaric acid, TMS                                            | 1666 |
|                     | Girdled      | 0.105964 | 0.016641 | 0.298738 | 0.018994 |       |       |        |                                                               |      |
|                     | Crown fire   | 0.269351 |          | 0.303868 | 0.039290 |       |       |        |                                                               |      |
|                     | Surface fire | 0.097930 | 0.02     | 0.483728 | 0.189567 |       |       |        |                                                               |      |

|                 |              |          |          |          |          |       |       |        |                                                                   |      |
|-----------------|--------------|----------|----------|----------|----------|-------|-------|--------|-------------------------------------------------------------------|------|
| Xylose          | Control      | 50.40489 | 2.798682 | 44.65955 | 4.658236 | 14.56 | 307.2 | C00181 | +)-Xylose, tetrakis(trimethylsilyl) ether, methyloxime (ant       | 1689 |
|                 | Girdled      | 52.94949 | 3.893338 | 44.62583 | 3.510715 |       |       |        |                                                                   |      |
|                 | Crown fire   | 71.80649 | 7.811885 | 40.68807 | 6.581154 |       |       |        |                                                                   |      |
|                 | Surface fire | 57.90267 | 1.035573 | 35.51283 | 2.016271 |       |       |        |                                                                   |      |
| Arabinose       | Control      | 142.2467 | 7.278524 | 60.85045 | 6.956826 | 14.57 | 103.1 | C00216 | Arabinose, tetrakis-TMS                                           | 1690 |
|                 | Girdled      | 142.3202 | 3.644465 | 59.23402 | 5.314491 |       |       |        |                                                                   |      |
|                 | Crown fire   | 182.0982 | 23.07803 | 52.33904 | 8.160722 |       |       |        |                                                                   |      |
|                 | Surface fire | 166.7593 | 6.07872  | 42.95568 | 3.297569 |       |       |        |                                                                   |      |
| Ribose          | Control      | 8.847632 | 0.273803 | 4.353782 | 0.296916 | 14.79 | 73.1  | C00121 | d-Ribose, 2,3,4,5-tetrakis-O-(trimethylsilyl)-, O-methyloxime     | 1710 |
|                 | Girdled      | 8.521124 | 0.207870 | 4.805905 | 0.197429 |       |       |        |                                                                   |      |
|                 | Crown fire   | 10.78582 | 0.614060 | 5.074899 | 0.395344 |       |       |        |                                                                   |      |
|                 | Surface fire | 10.59588 | 0.450228 | 5.192357 | 0.155136 |       |       |        |                                                                   |      |
| Arabinopyranose | Control      | 10.84902 | 1.295801 | 3.387141 | 0.262758 | 15.13 | 73.1  | C00259 | DL-Arabinopyranose, 4TMS                                          | 1741 |
|                 | Girdled      | 12.40288 | 1.527614 | 3.703035 | 0.558179 |       |       |        |                                                                   |      |
|                 | Crown fire   | 11.50259 | 2.128657 | 3.459582 | 0.132750 |       |       |        |                                                                   |      |
|                 | Surface fire | 13.17247 | 1.856511 | 2.428931 | 0.312043 |       |       |        |                                                                   |      |
| Arabitol        | Control      | 0.673967 | 0.061624 | 0.416330 | 0.034979 | 15.14 | 307.2 | C00532 | Arabitol (5TMS)                                                   | 1741 |
|                 | Girdled      | 0.743130 | 0.085825 | 0.503862 | 0.061632 |       |       |        |                                                                   |      |
|                 | Crown fire   | 0.543584 | 0.077697 | 0.484868 | 0.024331 |       |       |        |                                                                   |      |
|                 | Surface fire | 0.405468 | 0.109918 | 0.388344 | 0.046707 |       |       |        |                                                                   |      |
| Rhamnose        | Control      | 2.557831 | 0.258102 | 1.123096 | 0.042339 | 15.24 | 117.1 | C00507 | D(-)-Rhamnose, tetrakis(trimethylsilyl) ether, methyloxime (anti) | 1751 |
|                 | Girdled      | 1.485964 | 0.345341 | 1.380866 | 0.054519 |       |       |        |                                                                   |      |
|                 | Crown fire   | 1.602824 | 0.378484 | 1.333126 | 0.042774 |       |       |        |                                                                   |      |
|                 | Surface fire | 1.101917 | 0.540594 | 1.454995 | 0.268740 |       |       |        |                                                                   |      |
| Fucose          | Control      | 5.292569 | 0.043242 | 4.717381 | 0.077315 | 15.33 | 133.1 | C01019 | L(-)-Fucose, tetrakis(trimethylsilyl) ether, methyloxime (syn)    | 1759 |
|                 | Girdled      | 5.349474 | 0.080379 | 4.741306 | 0.065173 |       |       |        |                                                                   |      |
|                 | Crown fire   | 5.314923 | 0.096204 | 4.757261 | 0.112926 |       |       |        |                                                                   |      |
|                 | Surface fire | 5.269435 | 0.099336 | 4.522105 | 0.142650 |       |       |        |                                                                   |      |
| Tagatofuranose  | Control      | 0.179871 | 0.018147 | 0.102800 | 0.031910 | 15.6  | 233.1 | C00109 | D(-)-Tagatofuranose, pentakis(trimethylsilyl) ether               | 1781 |
|                 | Girdled      | 0.180987 | 0.024731 | 0.136400 | 0.029848 |       |       |        |                                                                   |      |
|                 | Crown fire   | 0.201369 | 0.015622 | 0.138763 | 0.019348 |       |       |        |                                                                   |      |
|                 | Surface fire | 0.173318 | 0.032593 | 0.132563 | 0.016021 |       |       |        |                                                                   |      |
| Glutamine       | Control      | 0.159468 | 0.034423 | 0.147438 | 0.025268 | 15.7  | 156.1 | C00064 | L-Glutamine, N,N2-bis(trimethylsilyl)-, trimethylsilyl ester      | 1791 |
|                 | Girdled      | 0.170948 | 0.031939 | 0.131881 | 0.017376 |       |       |        |                                                                   |      |
|                 | Crown fire   | 0.249381 | 0.167082 | 0.107090 | 0.020026 |       |       |        |                                                                   |      |
|                 | Surface fire | 0.208219 | 0.052575 | 0.120068 | 0.022850 |       |       |        |                                                                   |      |
| Fucitol         | Control      | 51.84187 | 4.444363 | 33.69088 | 2.430224 | 15.79 | 117.1 | C00109 | L-Fucitol, 5TMS                                                   | 1800 |
|                 | Girdled      | 46.01031 | 7.322338 | 31.76853 | 5.857911 |       |       |        |                                                                   |      |
|                 | Crown fire   | 55.74075 | 6.473291 | 31.28034 | 2.808581 |       |       |        |                                                                   |      |
|                 | Surface fire | 59.11594 | 6.482482 | 30.86332 | 0.694771 |       |       |        |                                                                   |      |
| Shikimic acid   | Control      | 0.015585 | 0.001970 | 0.859622 | 0.838716 | 16    | 204.1 | C00493 | Shikimic acid, 4TMS                                               | 1821 |
|                 | Girdled      | 0.223282 |          | 0.984302 | 0.957325 |       |       |        |                                                                   |      |
|                 | Crown fire   | 0.068524 |          | 1.763148 |          |       |       |        |                                                                   |      |
|                 | Surface fire | 0.267573 |          | 2.422976 | 0.18     |       |       |        |                                                                   |      |
| Fructofuranose  | Control      | 567.0259 | 275.7460 | 2.936119 | 1.396369 | 16.27 | 217.1 | C00109 | D(-)-Fructofuranose, pentakis(trimethylsilyl) ether               | 1848 |
|                 | Girdled      | 677.8888 | 246.0207 | 1.954682 | 0.562620 |       |       |        |                                                                   |      |
|                 | Crown fire   | 663.3880 | 362.0054 | 4.614955 | 1.396418 |       |       |        |                                                                   |      |
|                 | Surface fire | 956.2386 | 395.5601 | 5.368627 | 1.583050 |       |       |        |                                                                   |      |
| Quinic acid     | Control      | 15.13622 | 4.980943 | 11.98803 | 0.869475 | 16.78 | 345.2 | C00296 | Quinic acid (5TMS)                                                | 1899 |
|                 | Girdled      | 14.77051 | 5.379188 | 8.878646 | 4.413828 |       |       |        |                                                                   |      |
|                 | Crown fire   | 17.37832 | 6.966284 | 13.04476 | 0.344604 |       |       |        |                                                                   |      |
|                 | Surface fire | 31.42034 | 7.749166 | 7.38358  | 3.774836 |       |       |        |                                                                   |      |
| Dulcitol        | Control      | 4.972112 | 0.745519 | 5.991926 | 0.310373 | 17.63 | 319.2 | C01697 | Dulcitol, (6TMS)                                                  | 1983 |
|                 | Girdled      | 5.359271 | 0.326301 | 5.785282 | 0.600718 |       |       |        |                                                                   |      |
|                 | Crown fire   | 29.00182 | 22.61265 | 7.720778 | 0.951992 |       |       |        |                                                                   |      |
|                 | Surface fire | 6.86003  | 0.33792  | 8.056279 | 0.478138 |       |       |        |                                                                   |      |
| Gluconic acid   | Control      | 2.006818 | 0.688947 | 2.365733 | 0.116050 | 18.14 | 73.1  | C00257 | Gluconic acid, (6TMS)                                             | 2037 |
|                 | Girdled      | 2.489342 | 0.486093 | 2.390431 | 0.191035 |       |       |        |                                                                   |      |
|                 | Crown fire   | 2.559199 | 0.599031 | 2.726951 | 0.113431 |       |       |        |                                                                   |      |
|                 | Surface fire | 2.046023 | 0.661588 | 2.751070 | 0.083550 |       |       |        |                                                                   |      |
| Palmitic acid   | Control      | 5.274016 | 0.713848 | 4.360763 | 0.907173 | 18.32 | 117.1 | C00249 | Palmitic acid, TMS                                                | 2057 |
|                 | Girdled      | 4.363040 | 0.682818 | 3.546918 | 1.037045 |       |       |        |                                                                   |      |
|                 | Crown fire   | 5.547633 | 1.187611 | 4.805527 | 0.556185 |       |       |        |                                                                   |      |
|                 | Surface fire | 5.106419 | 1.412426 | 5.149855 | 0.604556 |       |       |        |                                                                   |      |
| myo-Inositol    | Control      | 202.0338 | 41.32483 | 47.37250 | 5.431780 | 19.06 | 73.1  | C00137 | myo-Inositol (6TMS)                                               | 2137 |
|                 | Girdled      | 212.5918 | 37.60974 | 47.00529 | 4.915399 |       |       |        |                                                                   |      |
|                 | Crown fire   | 191.8452 | 46.88433 | 39.54800 | 5.505183 |       |       |        |                                                                   |      |
|                 | Surface fire | 234.8342 | 47.53618 | 35.42988 | 1.725190 |       |       |        |                                                                   |      |
| Stearic acid    | Control      | 1.643285 | 0.213386 | 1.529055 | 0.326210 | 20.05 | 343.3 | C01530 | Stearic acid, trimethylsilyl ester                                | 2249 |
|                 | Girdled      | 1.366883 | 0.257069 | 1.228851 | 0.347212 |       |       |        |                                                                   |      |
|                 | Crown fire   | 1.837599 | 0.448064 | 1.710122 | 0.230562 |       |       |        |                                                                   |      |
|                 | Surface fire | 1.566350 | 0.452306 | 1.931095 | 0.248938 |       |       |        |                                                                   |      |

|                        |              |          |          |          |          |       |               |                                                    |                                                                   |      |
|------------------------|--------------|----------|----------|----------|----------|-------|---------------|----------------------------------------------------|-------------------------------------------------------------------|------|
| Talofuranose           | Control      | 2.795814 | 0.395373 | 1.046470 | 0.222759 | 22    | 217.1         | D-(+)-Talofuranose, pentakis(trimethylsilyl) ether | 2487                                                              |      |
|                        | Girdled      | 1.214518 | 0.610755 | 0.830242 | 0.143339 |       |               |                                                    |                                                                   |      |
|                        | Crown fire   | 3.694946 | 0.692181 | 0.912129 | 0.190127 |       |               |                                                    |                                                                   |      |
|                        | Surface fire | 3.263539 | 0.411094 | 0.874530 | 0.219306 |       |               |                                                    |                                                                   |      |
| Sorbofuranose          | Control      | 2.610586 | 0.150972 | 0.300134 | 0.051033 | 22.27 | 217.1         | L-(-)-Sorbofuranose, pentakis(trimethylsilyl)      | 2521                                                              |      |
|                        | Girdled      | 2.391139 | 0.204212 | 0.271072 | 0.095233 |       |               |                                                    |                                                                   |      |
|                        | Crown fire   | 2.907105 | 0.327119 | 0.257518 | 0.063738 |       |               |                                                    |                                                                   |      |
|                        | Surface fire | 2.552288 | 0.332027 | 0.209270 | 0.048927 |       |               |                                                    |                                                                   |      |
| Allofuranose           | Control      | 0.160465 | 0.070181 | 0.218629 | 0.071587 | 22.4  | 147.1         | D-Allofuranose, pentakis(trimethylsilyl)           | 2538                                                              |      |
|                        | Girdled      | 0.151296 | 0.011719 | 0.098654 | 0.015918 |       |               |                                                    |                                                                   |      |
|                        | Crown fire   | 0.108979 | 0.013679 | 0.125221 | 0.034442 |       |               |                                                    |                                                                   |      |
|                        | Surface fire | 0.125426 | 0.021094 | 0.147131 | 0.045669 |       |               |                                                    |                                                                   |      |
| Tagatose               | Control      | 2.248121 | 0.230480 | 8.746272 | 0.822886 | 22.63 | 73.1          | C00795                                             | D-(-)-Tagatose, pentakis(trimethylsilyl)                          | 2565 |
|                        | Girdled      | 1.777784 | 0.147910 | 10.01489 | 0.630415 |       |               |                                                    |                                                                   |      |
|                        | Crown fire   | 2.844177 | 0.165215 | 9.177165 | 0.708874 |       |               |                                                    |                                                                   |      |
|                        | Surface fire | 1.870328 | 0.036551 | 9.600240 | 0.638498 |       |               |                                                    |                                                                   |      |
| Ribofuranose           | Control      | 3.878091 | 0.400819 | 1.913122 | 0.199866 | 22.76 | 73.1          | D-(-)-Ribofuranose, tetrakis(trimethylsilyl)       | 2583                                                              |      |
|                        | Girdled      | 3.186002 | 0.251503 | 2.039227 | 0.230234 |       |               |                                                    |                                                                   |      |
|                        | Crown fire   | 4.592242 | 0.453558 | 2.084255 | 0.167402 |       |               |                                                    |                                                                   |      |
|                        | Surface fire | 3.809009 | 0.387000 | 1.905447 | 0.224123 |       |               |                                                    |                                                                   |      |
| Cellobiose             | Control      | 1.867436 | 0.166154 | 1.980627 | 0.117808 | 24.21 | 73.1          | C00185                                             | D-(+)-Cellobiose, octakis(trimethylsilyl) ether (isomer 2)        | 2783 |
|                        | Girdled      | 1.705156 | 0.056505 | 1.954585 | 0.058475 |       |               |                                                    |                                                                   |      |
|                        | Crown fire   | 2.084758 | 0.161554 | 1.981434 | 0.096229 |       |               |                                                    |                                                                   |      |
|                        | Surface fire | 1.855387 | 0.080124 | 2.053506 | 0.092139 |       |               |                                                    |                                                                   |      |
| Trehalose              | Control      | 0.036578 | 0.006045 | 0.190762 | 0.023536 | 24.45 | 361.2         | C01083                                             | D-(+)-Trehalose, octakis(trimethylsilyl) ether                    | 2816 |
|                        | Girdled      | 0.048191 | 0.002261 | 0.243654 | 0.046282 |       |               |                                                    |                                                                   |      |
|                        | Crown fire   | 0.050258 | 0.008797 | 0.152323 | 0.027315 |       |               |                                                    |                                                                   |      |
|                        | Surface fire | 0.066618 | 0.005903 | 0.118595 | 0.036532 |       |               |                                                    |                                                                   |      |
| Turanose               | Control      | 0.607658 | 0.081087 | 1.465417 | 0.074260 | 24.6  | 217.1         | C19636                                             | D(+)-Turanose, TMS                                                | 2838 |
|                        | Girdled      | 0.553332 | 0.026546 | 1.517695 | 0.133834 |       |               |                                                    |                                                                   |      |
|                        | Crown fire   | 0.555881 | 0.044801 | 1.649787 | 0.141177 |       |               |                                                    |                                                                   |      |
|                        | Surface fire | 0.614179 | 0.059139 | 1.514659 | 0.140770 |       |               |                                                    |                                                                   |      |
| Maltose                | Control      | 0.100228 | 0.013308 | 0.199145 | 0.038591 | 24.66 | 361.2         | C00208                                             | Maltose, TMS                                                      | 2846 |
|                        | Girdled      | 0.084460 | 0.020901 | 0.085974 | 0.027449 |       |               |                                                    |                                                                   |      |
|                        | Crown fire   | 0.126776 | 0.026543 | 0.109976 | 0.035436 |       |               |                                                    |                                                                   |      |
|                        | Surface fire | 0.088473 | 0.039687 | 0.164111 | 0.065026 |       |               |                                                    |                                                                   |      |
| 3 $\alpha$ -Mannobiose | Control      | 0.104358 | 0.007418 | 0.064768 | 0.004050 | 24.97 | 217.1         | C00208                                             | 3- $\alpha$ -Mannobiose, octakis(trimethylsilyl) ether (isomer 2) | 2890 |
|                        | Girdled      | 0.111301 | 0.011320 | 0.062512 | 0.011496 |       |               |                                                    |                                                                   |      |
|                        | Crown fire   | 0.087879 | 0.022934 | 0.110649 | 0.005903 |       |               |                                                    |                                                                   |      |
|                        | Surface fire | 0.067749 | 0.011502 | 0.077949 | 0.003869 |       |               |                                                    |                                                                   |      |
| Catechin               | Control      | 1.880863 | 0.199662 | 5.621223 | 0.531263 | 25.04 | 73.1          | C06562                                             | Catechine, penta-TMS-ether, (2R-cis)-                             | 2900 |
|                        | Girdled      | 1.832902 | 0.080908 | 5.545953 | 0.458364 |       |               |                                                    |                                                                   |      |
|                        | Crown fire   | 2.433844 | 0.239067 | 4.570497 | 0.376230 |       |               |                                                    |                                                                   |      |
|                        | Surface fire | 2.426421 | 0.218596 | 5.208667 | 0.438565 |       |               |                                                    |                                                                   |      |
| Epicatechin            | Control      | 0.064401 | 0.008464 | 0.105569 | 0.014271 | 25.2  | 368.2         | C09727                                             | Catechine, penta-TMS-ether, (2R-cis)-                             | 2922 |
|                        | Girdled      | 0.056979 | 0.005426 | 0.109339 | 0.012744 |       |               |                                                    |                                                                   |      |
|                        | Crown fire   | 0.089258 | 0.022135 | 0.093817 | 0.023398 |       |               |                                                    |                                                                   |      |
|                        | Surface fire | 0.086950 | 0.009877 | 0.123966 | 0.026554 |       |               |                                                    |                                                                   |      |
| Melibiose              | Control      | 0.010378 | 0.002463 | 0.035189 | 0.009916 | 25.21 | 370.2         | C05402                                             | Melibiose, octakis(trimethylsilyl)-                               | 2924 |
|                        | Girdled      | 0.009645 | 0.002930 | 0.029520 | 0.000887 |       |               |                                                    |                                                                   |      |
|                        | Crown fire   | 0.021342 | 0.005981 | 0.026263 | 0.002501 |       |               |                                                    |                                                                   |      |
|                        | Surface fire | 0.017132 | 0.004673 | 0.026798 | 0.006744 |       |               |                                                    |                                                                   |      |
| Galactinol             | Control      | 0.126550 | 0.024699 | 0.171565 | 0.044397 | 26.35 | 204.1         | C01235                                             | Galactinol, nonakis(trimethylsilyl) ether                         | 3041 |
|                        | Girdled      | 0.091049 | 0.020290 | 0.136785 | 0.044601 |       |               |                                                    |                                                                   |      |
|                        | Crown fire   | 0.261870 | 0.043515 | 0.396567 | 0.088904 |       |               |                                                    |                                                                   |      |
|                        | Surface fire | 0.251673 | 0.039583 | 0.398081 | 0.103769 |       |               |                                                    |                                                                   |      |
| Chlorogenic acid       | Control      | 0.359233 | 0.013089 | 0.041827 | 0.008254 | 27.27 | 73.1          | C00852                                             | Chlorogenic acid (6TMS)                                           | 3105 |
|                        | Girdled      | 0.352237 | 0.006563 | 0.037392 | 0.011729 |       |               |                                                    |                                                                   |      |
|                        | Crown fire   | 0.488540 | 0.015490 | 0.033216 | 0.008208 |       |               |                                                    |                                                                   |      |
|                        | Surface fire | 0.465823 | 0.029440 | 0.023969 | 0.007848 |       |               |                                                    |                                                                   |      |
| Internal standard:     |              |          |          |          |          |       |               |                                                    |                                                                   |      |
| Adonitol (Ribitol)     |              |          |          |          |          | 15.3  | 147; 217; 103 | C00474                                             | Ribitol, 5TMS                                                     | 1756 |

**Online Resource 3:**

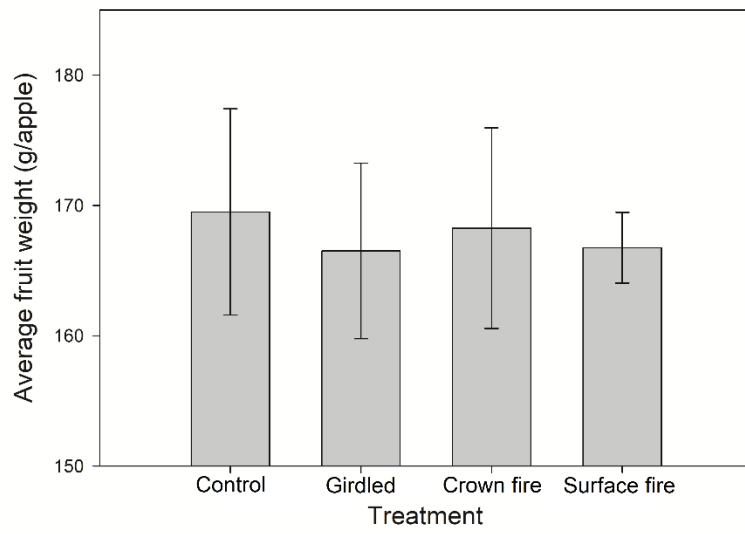

Effects of control, trunk girdling, simulated crown fire and simulated surface fire treatments on average weight per apple in the middle section of the canopy at harvest the subsequent growing season following the treatment period (mean  $\pm$  SE; n = 4)
